# Supplementary material for: Deep Learning Methods for Improving Pollen Monitoring
Source: MDPI journal article supplement (doi:10.3390/s21103526), 2021-05-19
Supplement: s1 [file s1]

**Table S1.** The results for chosen models trained using the Pollen13K dataset

| Model                      | Accuracy for Pollen13K Data |
|----------------------------|-----------------------------|
| FinetunedPollen13K_AlexNet | 95.43%                      |
| ScratchPollen13K_AlexNet   | 91.81%                      |
| FinetunedPollen13K_ResNet  | 95.53%                      |
| ScratchPollen13K_ResNet    | 93.47%                      |

**Table S2.** The comparison of SimpleModel accuracies for the filter size.

|                                               | Filter Size $3 \times 3$ | Filter Size $4 \times 4$ | Filter Size $5 \times 5$ |
|-----------------------------------------------|--------------------------|--------------------------|--------------------------|
| Final accuracy on test set (after 100 epochs) | 68%                      | 80%                      | 72%                      |
| The best accuracy on test set                 | 76%                      | 80%                      | 78%                      |

**Table S3.** The detailed outcomes of  $3 \times 10$ CV of the models pre-trained on ImageNet images and fine-tuned on ABCPollen microscopic images.

|              |         | Repetition 1 |                     | Repetition 2 |                     | Repetition 3 |                     |
|--------------|---------|--------------|---------------------|--------------|---------------------|--------------|---------------------|
|              |         | Avg Accuracy | Std Dev of Accuracy | Avg Accuracy | Std Dev of Accuracy | Avg Accuracy | Std Dev of Accuracy |
| Orig_AlexNet | Fold 1  | 83.83%       | 0.038               | 85.63%       | 0.036               | 93.83%       | 0.012               |
|              | Fold 2  | 93.36%       | 0.026               | 93.91%       | 0.023               | 93.91%       | 0.005               |
|              | Fold 3  | 94.61%       | 0.015               | 88.13%       | 0.011               | 89.84%       | 0.006               |
|              | Fold 4  | 93.67%       | 0.007               | 90.78%       | 0.025               | 92.27%       | 0.015               |
|              | Fold 5  | 89.45%       | 0.029               | 93.36%       | 0.008               | 90.70%       | 0.007               |
|              | Fold 6  | 94.38%       | 0.005               | 95.31%       | 0.018               | 88.36%       | 0.017               |
|              | Fold 7  | 87.73%       | 0.007               | 92.89%       | 0.006               | 95.39%       | 0.009               |
|              | Fold 8  | 90.16%       | 0.012               | 92.73%       | 0.025               | 90.00%       | 0.009               |
|              | Fold 9  | 87.19%       | 0.025               | 89.53%       | 0.008               | 92.97%       | 0.016               |
|              | Fold 10 | 91.33%       | 0.011               | 89.77%       | 0.006               | 93.36%       | 0.013               |
| Orig_ResNet  | Fold 1  | 98.13%       | 0.011               | 96.25%       | 0.010               | 95.47%       | 0.006               |
|              | Fold 2  | 96.09%       | 0.008               | 99.22%       | 0.006               | 97.58%       | 0.002               |
|              | Fold 3  | 98.44%       | 0.015               | 97.27%       | 0.004               | 93.20%       | 0.004               |
|              | Fold 4  | 97.03%       | 0.007               | 99.14%       | 0.002               | 98.05%       | 0.016               |
|              | Fold 5  | 99.22%       | 0.000               | 96.48%       | 0.006               | 97.27%       | 0.023               |
|              | Fold 6  | 93.28%       | 0.015               | 94.92%       | 0.004               | 100.00%      | 0.000               |
|              | Fold 7  | 96.80%       | 0.009               | 95.94%       | 0.005               | 95.70%       | 0.004               |
|              | Fold 8  | 97.03%       | 0.003               | 98.67%       | 0.006               | 96.25%       | 0.005               |
|              | Fold 9  | 97.27%       | 0.013               | 98.91%       | 0.005               | 96.88%       | 0.000               |
|              | Fold 10 | 97.73%       | 0.004               | 96.02%       | 0.009               | 97.97%       | 0.005               |
| Orig_VGG     | Fold 1  | 99.22%       | 0.000               | 96.25%       | 0.006               | 98.44%       | 0.000               |
|              | Fold 2  | 99.06%       | 0.003               | 97.11%       | 0.007               | 96.72%       | 0.005               |
|              | Fold 3  | 99.30%       | 0.007               | 98.13%       | 0.011               | 99.30%       | 0.006               |
|              | Fold 4  | 98.59%       | 0.008               | 98.44%       | 0.000               | 96.95%       | 0.002               |
|              | Fold 5  | 98.36%       | 0.002               | 98.13%       | 0.005               | 96.41%       | 0.004               |
|              | Fold 6  | 97.11%       | 0.005               | 94.38%       | 0.006               | 96.95%       | 0.002               |
|              | Fold 7  | 93.98%       | 0.004               | 97.73%       | 0.002               | 96.17%       | 0.004               |
|              | Fold 8  | 96.64%       | 0.004               | 97.73%       | 0.012               | 96.09%       | 0.005               |
|              | Fold 9  | 96.88%       | 0.000               | 96.80%       | 0.004               | 97.50%       | 0.005               |
|              | Fold 10 | 97.81%       | 0.003               | 96.25%       | 0.003               | 98.05%       | 0.006               |

|                  |         |        |       |        |       |        |       |
|------------------|---------|--------|-------|--------|-------|--------|-------|
| Orig_SqueezeNet  | Fold 1  | 96.95% | 0.002 | 93.05% | 0.028 | 96.33% | 0.004 |
|                  | Fold 2  | 95.31% | 0.008 | 95.31% | 0.000 | 96.88% | 0.000 |
|                  | Fold 3  | 95.47% | 0.010 | 97.66% | 0.007 | 96.88% | 0.000 |
|                  | Fold 4  | 99.84% | 0.003 | 98.44% | 0.000 | 95.31% | 0.000 |
|                  | Fold 5  | 96.09% | 0.000 | 96.41% | 0.009 | 99.22% | 0.000 |
|                  | Fold 6  | 98.28% | 0.003 | 98.52% | 0.002 | 96.17% | 0.006 |
|                  | Fold 7  | 97.11% | 0.004 | 94.61% | 0.008 | 96.80% | 0.002 |
|                  | Fold 8  | 96.95% | 0.002 | 98.44% | 0.000 | 96.41% | 0.004 |
|                  | Fold 9  | 96.88% | 0.000 | 95.16% | 0.024 | 98.44% | 0.000 |
|                  | Fold 10 | 95.78% | 0.008 | 94.77% | 0.005 | 96.95% | 0.002 |
| Orig_DenseNet    | Fold 1  | 97.27% | 0.004 | 96.72% | 0.006 | 95.78% | 0.010 |
|                  | Fold 2  | 98.20% | 0.004 | 97.19% | 0.004 | 98.75% | 0.004 |
|                  | Fold 3  | 97.19% | 0.007 | 99.61% | 0.004 | 94.30% | 0.021 |
|                  | Fold 4  | 97.58% | 0.002 | 97.89% | 0.005 | 99.14% | 0.006 |
|                  | Fold 5  | 96.48% | 0.008 | 96.17% | 0.009 | 96.33% | 0.056 |
|                  | Fold 6  | 97.19% | 0.008 | 95.23% | 0.004 | 98.28% | 0.003 |
|                  | Fold 7  | 97.58% | 0.015 | 98.36% | 0.006 | 96.48% | 0.004 |
|                  | Fold 8  | 94.61% | 0.032 | 95.31% | 0.004 | 97.73% | 0.008 |
|                  | Fold 9  | 98.52% | 0.002 | 99.06% | 0.005 | 96.95% | 0.014 |
|                  | Fold 10 | 97.58% | 0.004 | 96.88% | 0.000 | 96.95% | 0.011 |
| Orig_InceptionV3 | Fold 1  | 98.44% | 0.004 | 97.19% | 0.009 | 92.97% | 0.011 |
|                  | Fold 2  | 96.48% | 0.006 | 98.59% | 0.003 | 95.47% | 0.009 |
|                  | Fold 3  | 97.73% | 0.002 | 98.98% | 0.004 | 98.44% | 0.006 |
|                  | Fold 4  | 96.88% | 0.007 | 98.28% | 0.005 | 98.05% | 0.004 |
|                  | Fold 5  | 97.58% | 0.006 | 97.19% | 0.010 | 96.80% | 0.012 |
|                  | Fold 6  | 96.88% | 0.012 | 97.42% | 0.007 | 96.48% | 0.010 |
|                  | Fold 7  | 97.81% | 0.013 | 95.31% | 0.007 | 97.58% | 0.011 |
|                  | Fold 8  | 97.66% | 0.004 | 96.17% | 0.007 | 94.38% | 0.005 |
|                  | Fold 9  | 97.19% | 0.022 | 96.64% | 0.006 | 95.78% | 0.019 |
|                  | Fold 10 | 97.19% | 0.008 | 94.84% | 0.008 | 98.44% | 0.005 |
